# Supplementary material for: Effect of cadmium on young plants of Virola surinamensis
Source: PubMed Central journal article supplement (PMC6524489; doi:10.1093/aobpla/plz022), 2019-04-05
Supplement: plz022_suppl_supplementary_appendix_s1.pdf [file plz022_suppl_supplementary_appendix_s1.pdf]

| TREATMENT | SPAD  | A     | gs_mmol | Ci     | E    | A_E  | A_Ci | FV_FM | NPQ  | ETR   | qP   | Ψpd   |
|-----------|-------|-------|---------|--------|------|------|------|-------|------|-------|------|-------|
| 0 mg Cd   | 38,33 | 12,30 | 71,48   | 82,77  | 1,95 | 6,31 | 0,15 | 0,94  | 1,28 | 81,61 | 0,19 | -0,29 |
| 0 mg Cd   | 38,15 | 12,30 | 71,48   | 98,33  | 1,88 | 6,55 | 0,13 | 0,94  | 1,28 | 80,79 | 0,19 | -0,28 |
| 0 mg Cd   | 38,80 | 12,39 | 62,84   | 87,60  | 1,98 | 6,26 | 0,14 | 0,94  | 1,29 | 79,97 | 0,19 | -0,31 |
| 0 mg Cd   | 38,20 | 12,39 | 73,09   | 82,77  | 1,98 | 6,26 | 0,15 | 0,94  | 1,31 | 79,97 | 0,19 | -0,31 |
| 0 mg Cd   | 38,15 | 13,30 | 73,09   | 98,33  | 1,95 | 6,82 | 0,14 | 0,94  | 1,31 | 81,61 | 0,19 | -0,29 |
| 0 mg Cd   | 38,47 | 12,80 | 67,16   | 90,55  | 1,96 | 6,51 | 0,14 | 0,94  | 1,30 | 81,20 | 0,19 | -0,28 |
| 0 mg Cd   | 38,40 | 13,05 | 65,00   | 94,44  | 1,92 | 6,79 | 0,14 | 0,94  | 1,29 | 80,58 | 0,19 | -0,27 |
| 15 mg Cd  | 42,28 | 9,33  | 39,94   | 101,43 | 1,25 | 7,48 | 0,09 | 0,92  | 1,39 | 65,53 | 0,16 | -0,30 |
| 15 mg Cd  | 41,90 | 9,43  | 25,51   | 91,90  | 1,28 | 7,40 | 0,10 | 0,92  | 1,40 | 65,33 | 0,16 | -0,35 |
| 15 mg Cd  | 41,90 | 9,23  | 42,01   | 101,43 | 1,22 | 7,58 | 0,09 | 0,92  | 1,42 | 65,33 | 0,15 | -0,37 |
| 15 mg Cd  | 41,20 | 9,43  | 42,01   | 100,95 | 1,28 | 7,40 | 0,09 | 0,93  | 1,41 | 65,72 | 0,15 | -0,30 |
| 15 mg Cd  | 41,30 | 9,23  | 39,94   | 89,86  | 1,22 | 7,58 | 0,10 | 0,92  | 1,38 | 65,72 | 0,17 | -0,34 |
| 15 mg Cd  | 39,85 | 9,38  | 33,76   | 95,64  | 1,26 | 7,44 | 0,10 | 0,92  | 1,39 | 65,62 | 0,16 | -0,30 |
| 15 mg Cd  | 39,12 | 9,41  | 29,63   | 98,30  | 1,27 | 7,42 | 0,10 | 0,93  | 1,39 | 65,67 | 0,16 | -0,32 |
| 30 mg Cd  | 43,44 | 2,73  | 16,20   | 204,91 | 0,57 | 4,83 | 0,01 | 0,92  | 2,10 | 32,72 | 0,11 | -0,32 |
| 30 mg Cd  | 43,06 | 2,66  | 26,65   | 205,83 | 0,63 | 4,24 | 0,01 | 0,92  | 2,07 | 33,10 | 0,13 | -0,37 |
| 30 mg Cd  | 43,10 | 2,66  | 16,20   | 205,37 | 0,57 | 4,71 | 0,01 | 0,92  | 2,09 | 32,72 | 0,11 | -0,30 |
| 30 mg Cd  | 43,30 | 2,72  | 27,41   | 204,91 | 0,54 | 5,02 | 0,01 | 0,92  | 2,09 | 32,91 | 0,10 | -0,35 |
| 30 mg Cd  | 43,30 | 2,84  | 6,54    | 205,83 | 0,54 | 5,23 | 0,01 | 0,92  | 2,12 | 33,10 | 0,08 | -0,36 |
| 30 mg Cd  | 43,20 | 2,78  | 11,37   | 205,60 | 0,60 | 4,67 | 0,01 | 0,92  | 2,09 | 32,81 | 0,10 | -0,36 |
| 30 mg Cd  | 43,25 | 2,81  | 19,01   | 205,26 | 0,57 | 4,93 | 0,01 | 0,92  | 2,11 | 32,86 | 0,09 | -0,36 |
| 45 mg Cd  | 25,50 | 1,65  | 19,45   | 221,42 | 0,45 | 3,63 | 0,01 | 0,89  | 1,75 | 26,21 | 0,08 | -0,35 |
| 45 mg Cd  | 24,50 | 1,65  | 10,37   | 217,62 | 0,45 | 3,63 | 0,01 | 0,90  | 1,81 | 26,90 | 0,10 | -0,33 |
| 45 mg Cd  | 25,50 | 1,69  | 19,45   | 219,52 | 0,46 | 3,70 | 0,01 | 0,89  | 1,77 | 26,05 | 0,12 | -0,37 |
| 45 mg Cd  | 25,50 | 1,87  | 15,97   | 217,62 | 0,46 | 4,09 | 0,01 | 0,89  | 1,81 | 25,54 | 0,10 | -0,38 |
| 45 mg Cd  | 26,50 | 1,59  | 7,30    | 221,42 | 0,45 | 4,05 | 0,01 | 0,89  | 1,74 | 25,54 | 0,11 | -0,39 |
| 45 mg Cd  | 25,00 | 1,73  | 11,63   | 218,57 | 0,46 | 3,79 | 0,01 | 0,89  | 1,77 | 26,22 | 0,08 | -0,38 |
| 45 mg Cd  | 25,25 | 1,71  | 15,54   | 220,00 | 0,45 | 4,03 | 0,01 | 0,90  | 1,75 | 25,88 | 0,08 | -0,36 |
| 60 mg Cd  | 18,10 | 1,48  | 13,17   | 204,52 | 0,48 | 3,10 | 0,01 | 0,88  | 2,18 | 16,23 | 0,08 | -0,42 |
| 60 mg Cd  | 17,30 | 1,74  | 13,17   | 204,52 | 0,48 | 3,65 | 0,01 | 0,88  | 2,16 | 15,20 | 0,07 | -0,45 |
| 60 mg Cd  | 17,30 | 1,71  | 17,24   | 206,85 | 0,51 | 3,34 | 0,01 | 0,88  | 2,17 | 16,09 | 0,08 | -0,45 |
| 60 mg Cd  | 19,70 | 1,48  | 9,42    | 206,85 | 0,46 | 3,24 | 0,01 | 0,88  | 2,17 | 16,09 | 0,07 | -0,46 |
| 60 mg Cd  | 18,10 | 1,60  | 16,93   | 205,69 | 0,46 | 3,51 | 0,01 | 0,88  | 2,18 | 16,23 | 0,06 | -0,47 |
| 60 mg Cd  | 18,90 | 1,61  | 11,29   | 206,27 | 0,49 | 3,26 | 0,01 | 0,88  | 2,18 | 15,71 | 0,07 | -0,48 |
| 60 mg Cd  | 18,50 | 1,54  | 10,35   | 206,56 | 0,50 | 3,07 | 0,01 | 0,88  | 2,18 | 15,97 | 0,06 | -0,50 |
