# Supplementary material for: Effect of cadmium on young plants of Virola surinamensis
Source: PubMed Central journal article supplement (PMC6524489; doi:10.1093/aobpla/plz022), 2019-04-05
Supplement: plz022_suppl_supplementary_appendix_s2.pdf [file plz022_suppl_supplementary_appendix_s2.pdf]

| TREATMENT |      | BCF_Root | BCF_Stem    | BCF_Leaf    | TF          | TI        | Cd_Root  |
|-----------|------|----------|-------------|-------------|-------------|-----------|----------|
| 0 mg Cd   | T1R1 |          |             |             |             |           |          |
| 0 mg Cd   | T1R2 |          |             |             |             |           |          |
| 0 mg Cd   | T1R3 |          |             |             |             |           |          |
| 0 mg Cd   | T1R4 |          |             |             |             |           |          |
| 0 mg Cd   | T1R5 |          |             |             |             |           |          |
| 0 mg Cd   | T1R6 |          |             |             |             |           |          |
| 0 mg Cd   | T1R7 |          |             |             |             |           |          |
| 15 mg Cd  | T2R1 | 17,86163 | 0,990406667 | 0,193566667 | 0,066285838 | 71,493321 | 267,9245 |
| 15 mg Cd  | T2R2 | 17,86163 | 0,990406667 | 0,193566667 | 0,066285838 | 69,255548 | 267,9245 |
| 15 mg Cd  | T2R3 | 17,86163 | 0,990406667 | 0,193566667 | 0,066285838 | 69,071669 | 267,9245 |
| 15 mg Cd  | T2R4 | 17,86163 | 0,990406667 | 0,193566667 | 0,066285838 | 70,037273 | 267,9245 |
| 15 mg Cd  | T2R5 | 16,84961 | 0,854126667 | 0,19552     | 0,062295    | 68,152174 | 252,7442 |
| 15 mg Cd  | T1R6 | 16,84961 | 0,854126667 | 0,19552     | 0,062295    | 72,726157 | 252,7442 |
| 15 mg Cd  | T1R7 | 16,84961 | 0,854126667 | 0,19552     | 0,062295    | 70,666667 | 252,7442 |
| 30 mg Cd  | T3R1 | 45,09787 | 0,52812     | 0,06354     | 0,013119468 | 58,062977 | 1352,936 |
| 30 mg Cd  | T3R2 | 45,09787 | 0,52812     | 0,06354     | 0,013119468 | 56,299213 | 1352,936 |
| 30 mg Cd  | T3R3 | 45,09787 | 0,52812     | 0,06354     | 0,013119468 | 59,64406  | 1352,936 |
| 30 mg Cd  | T2R4 | 45,09787 | 0,52812     | 0,06354     | 0,013119468 | 57,039798 | 1352,936 |
| 30 mg Cd  | T3R5 | 40,04203 | 0,64158     | 0,062373333 | 0,017580359 | 55,797101 | 1201,261 |
| 30 mg Cd  | T1R6 | 40,04203 | 0,64158     | 0,062373333 | 0,017580359 | 57,002578 | 1201,261 |
| 30 mg Cd  | T1R7 | 40,04203 | 0,64158     | 0,062373333 | 0,017580359 | 52,916667 | 1201,261 |
| 45 mg Cd  | T4R1 | 31,48936 | 0,552624444 | 0,134682222 | 0,021826635 | 44,391102 | 1417,021 |
| 45 mg Cd  | T4R2 | 31,48936 | 0,552624444 | 0,134682222 | 0,021826635 | 44,544858 | 1417,021 |
| 45 mg Cd  | T4R3 | 31,48936 | 0,552624444 | 0,134682222 | 0,021826635 | 44,125782 | 1417,021 |
| 45 mg Cd  | T4R4 | 31,48936 | 0,552624444 | 0,134682222 | 0,021826635 | 43,344956 | 1417,021 |
| 45 mg Cd  | T4R5 | 27,15893 | 0,507528889 | 0,14312     | 0,023957086 | 43,88285  | 1222,152 |
| 45 mg Cd  | T1R6 | 27,15893 | 0,507528889 | 0,14312     | 0,023957086 | 46,360624 | 1222,152 |
| 45 mg Cd  | T1R7 | 27,15893 | 0,507528889 | 0,14312     | 0,023957086 | 44,803571 | 1222,152 |
| 60 mg Cd  | T5R1 | 18,467   | 0,210733333 | 0,045806667 | 0,013891807 | 44,513359 | 1108,02  |
| 60 mg Cd  | T5R2 | 18,467   | 0,210733333 | 0,045806667 | 0,013891807 | 45,430685 | 1108,02  |
| 60 mg Cd  | T5R3 | 18,467   | 0,210733333 | 0,045806667 | 0,013891807 | 42,087542 | 1108,02  |
| 60 mg Cd  | T5R4 | 18,467   | 0,210733333 | 0,045806667 | 0,013891807 | 44,078394 | 1108,02  |
| 60 mg Cd  | T5R5 | 17,92059 | 0,180378333 | 0,031776667 | 0,011838618 | 44,299517 | 1075,235 |
| 60 mg Cd  | T1R6 | 17,92059 | 0,180378333 | 0,031776667 | 0,011838618 | 45,906469 | 1075,235 |
| 60 mg Cd  | T1R7 | 17,92059 | 0,180378333 | 0,031776667 | 0,011838618 | 44,642857 | 1075,235 |

Cd\_Stem Cd\_Leaf

|         |          |
|---------|----------|
| 14,8561 | 2,9035   |
| 14,8561 | 2,9035   |
| 14,8561 | 2,9035   |
| 14,8561 | 2,9035   |
| 12,8119 | 2,9328   |
| 12,8119 | 2,9328   |
| 12,8119 | 2,9328   |
| 15,8436 | 1,9062   |
| 15,8436 | 1,9062   |
| 15,8436 | 1,9062   |
| 15,8436 | 1,9062   |
| 19,2474 | 1,8712   |
| 19,2474 | 1,8712   |
| 19,2474 | 1,8712   |
| 24,8681 | 6,0607   |
| 24,8681 | 6,0607   |
| 24,8681 | 6,0607   |
| 24,8681 | 6,0607   |
| 22,8388 | 6,4404   |
| 22,8388 | 6,4404   |
| 22,8388 | 6,4404   |
| 12,644  | 2,432725 |
| 12,644  | 2,432725 |
| 12,644  | 2,432725 |
| 12,644  | 2,432725 |
| 10,8227 | 2,3275   |
| 10,8227 | 2,3275   |
| 10,8227 | 2,3275   |
